# Supplementary material for: Combined detection in type identification and curative effect evaluation of neonatal infectious pneumonia
Source: Research Square preprint supplement (doi:10.21203/rs.3.rs-7353556/v1), 2025-10-08
Supplement: Supplementary file 1 [file 3d5d8e966d19b4076cc26c28.xlsx]

## Sheet: 实验组
床号	孕周	体重	胸片	病原体	药敏	血红蛋白	乳酸	白细胞	血小板	中性粒细胞	CRP	降钙素原	IgG	IgA	IgM	出生日期	住院时间	是否使用抗生素及天数	呼吸支持及天数	预后	程度
5床	38+6	3.8	双肺透亮度减低，右侧肺野纹理模糊		无	无	5.1	20.5	248	79.7	17.1	无	12.1	<0.07	0.09	2022.3.12	3.13~3.19	青霉素+头孢噻肟	箱内吸氧	治愈	1
52床	38+6	3.05	双肺结节状改变	无	无	143	2.8	12.4	343	53.3	9	无	10.2	0.33	2.24	2022.4.6	4.22~5.2	青霉素+头孢噻肟	无	治愈	0
27床	39	4.35	左中下肺野密度增高影	金黄色葡萄球菌/耐甲氧西林葡萄球菌，痰培:耐甲氧西林金葡菌，衣原体阳性	万古霉素敏感	92	1.1	9.5	365	21.9	0.9	无	4.51	0.13	0.42	2022.3.27	4.23~5.5	头孢噻肟+阿奇霉素	无创	好转	1
50床	39+1	3	双肺纹理增多	血培:表皮葡萄球菌	青霉素耐药	129	2.5	10.2	411	14.2	1.1	未查	7.74	<0.07	0.19	2022.1.22	2.15~2.25	头孢呋辛	无	治愈	0
22床	39+1	2.5	支气管炎	无	无	163	9.1	23.3	270	82.3	超<0.5	未查	9.34	<0.07	0.09	2022.2.11	2.11~2.17	头他+青霉素	无	治愈	0
53床	42+2	3.65	支气管肺炎	无	无	149	4.1	14.3	387	20.5	超<0.5	未查	7.52	0.1	0.31	2022.1.5	2.11~2.17	头孢呋辛3天	无	治愈	0
33床	39+2	3.2	阴性	无	无	143	5.9	23	344	76.6	超<0.5	未查	7.98	<0.07	0.15	2022.2.23	2.23~2.27	头孢曲松+青霉素	无	治愈	0
43床	38+5	3.8	双肺纹理增粗模糊	无	无	154	1.4	10.3	116	63.9	1.8	未查	9.09	<0.07	0.11	3.26	3.27~4.4	青霉素+头孢噻肟	NCpap	治愈	1
21床	40+4	3.2	双肺纹理模糊不清	无	无	187	2.5-4.4	9.8	279	72	47	4.22	10.8	<0.07	0.11	2022.3.30	3.30~4.12	头塞+青霉素/美罗培南	无	治愈	0
28床	40+1	3.2	新生儿肺炎	无	无	148	2.6	12.5	371	50.4	无	无	7.99	<0.07	0.5	2022.3.13	3.25~4.1	头塞+青霉素	箱内吸氧	治愈	1
48床	37+5	3.35	肺炎	无	无	131	3.5	9.1	357	38.7	0.4	无	5.58	<0.07	0.25	2022.4.16	5.3~5.9	头塞	无	治愈	0
42床	39+3	3	-	无	无	164	4.9	22.9	296	72.6	6.5	无	9.64	<0.07	0.12	2022.4.30	4.30~5.8	头塞+青霉素	无创	好转	1
48床	39	3.65	支气管肺炎	流感嗜血杆菌	无	151	4.7	8.3	550	25.8	1.4	无	9.33	<0.07	0.85	2022.2.7	2.21~2.27	头他+青霉素，头曲	无	治愈	0
49床	40	3.8	支气管炎	耐甲氧西林葡萄球菌/金黄色葡萄球菌	无	151	3.2	11.1	336	24.7	0.8	无	6.21	0.09	0.34	2022.1.9	2.5~2.15	头他+青霉素	无	治愈	0
45床	37+5	3.65	肺炎	无	无	123	0.7	9.8	209	47.6	4.98	无	12.2	0.09	0.48	2022.1.29	2.26~3.7	头塞	有创SIMV	治愈	2
14床	40+1	3.9	肺炎	痰培:金葡菌	敏感	105	2	16.1	329	25	2.52	0.18	10.07	0.11	0.74	2022.3.18	4.13~5.3	头他+青霉素	SIMV	治愈	2
2床	38+5	3.8	肺炎	无	无	154	1.4	10.3	116	63.9	1.8	无	9.09	<0.07	0.11	2022.3.26	3.27~4.4	头塞+青霉素	Ncpap	治愈	1
45床	38+5	4.2	肺炎	无	无	146	2.3	9.1	258	27	0.3	无	5.52	<0.07	0.23	2022.3.11	4.3~4.10	头塞	无	治愈	0
49床	39+1	3.35	无异常	无	无	163	4.3	14.7	638	39.9	0.9	无	10.1	<0.07	0.39	2022.2.16	3.1~3.5	头塞3天	无	治愈	0
21床	40+4	3.2	双肺纹理模糊	无	无	187	2.5-4.4	9.9	279	72	47	4.22	10.8	<0.07	0.11	2022.3.30	3.30~4.12	头塞+青霉素，美罗培南	无	好转	0
43床	38+1	2.65	双肺纹理增多模糊	无	无	152	4.6-5.4	9.6	182	19.5	0.2	无	6.31	<0.07	0.44	2022.4.6	4.24~5.1	头塞4天	无	治愈	0
58床	37+5	2.8	双肺纹理增多模糊	流感嗜血杆菌	无	110	2.1	7.2	242	18.1	1	0.12	5.26	0.09	0.19	2021.12.4	1.1~1.9	头孢呋辛	无	治愈	0
68床	37+6	2.75	双肺纹理增多模糊	无	无	223	2.9	16.1	340	61.6	<0.2	无	10.3	<0.07	0.09	2022.1.8	1.8~1.15	头塞+青霉素	无	治愈	0
62床	38+4	3.5	双肺弥漫性多大病变	无	无	176	2.3	13.9	380	21.9	<0.5	无	7.74	<0.07	0.88	2021.12.30	1.15~1.25	头塞+青霉素	无	治愈	0
55床	40+1	3.25	阴性	无	无	115	1.5	7.4	450	28.5	1	无	4.51	<0.07	0.15	2021.12.26	1.20~1.25	头孢呋辛	无	治愈	0
45床	41+2	3.15	双肺纹理增多	无	无	162	2.2	8.7	253	55.8	0.7	无	10	<0.07	0.19	1.19	1.19~1.27	头塞	无	治愈	0
50床	38+1	4.1	阴性	无	无	162	2.2	20.5	268	65.7	<0.2	无	9.01	<0.08	0.23	1.22	1.22~1.27	头塞+青霉素	无	治愈	0
14床	37+3	3	双肺纹理增多	嗜肺军团菌	无	193	1.1-3.1-1.9	16.3	266	36.7	<0.2	无	10.5	<0.09	0.47	1.6	1.6~1.17	头塞+青霉素	无	好转	0
61床	40+6	3.55	阴性	大肠埃希菌/解鸟氨酸拉乌尔菌	无	102	1.5	5.7	234	31.7	1.4	无	11.8	<0.10	0.29	2021.12.8	1.3~1.14	阿奇	无	好转	0
47床	37+3	2.7	双肺肺炎	无	无	116	4.4	11.8	416	16.7	7.2	无	6.94	<0.07	0.32	2021.12.30	1.18~1.24	头夫	无	治愈	0
34床	37+6	3.2	肺炎	无	无	150	1.7	14.7	302	64.6	<0.5	无	7.37	<0.07	0.05	2022.2.23	2.23~2.28	头曲+青霉素	无	治愈	0
46床	38	3.65	支气管肺炎	无	无	102	4	7.2	279	20.3	0.5	无	5.26	<0.07	0.21	2822.1.11	2.6~2.14	头他+阿奇	无	好转	0
56床	37	3.3	支气管炎	痰大肠埃希菌	无	128	4.1	7.6	548	32.4	0.3	无	5.41	<0.07	0.15	2022.2.8	2.27~3.3	头曲	无	治愈	0
8床	39	3.35	双肺多发浸润	无	无	127	1.9	11.7	304	41.3	3.5	无	8.86	0.21	1.73	2022.4.4	4.26~5.4	头孢噻肟+阿奇霉素	无创	治愈	1
5床	40+1	3.5	SIMV	痰培养金黄色葡萄球菌	敏感	105	3.5-1.2	16.1	329	25	2.52	0.18	7.47	<0.07	0.49	2022.3.18	4.13~5.3	青霉素+头他	SIMV模式	治愈	2
27床	39	4.35	CT双肺炎症	衣原体阳性，金葡菌	无	92	1.1-2.0	9.5	365	21.9	0.9	无	4.51	0.13	0.42	2022.3.27	4.23~5.5	头+阿奇	无创	好转	1
15床	39+6	3.6	肺炎	无	无	156	3.1	17.6	314	14.1	22.7	无	9.27	<0.07	0.15	2022.5.7	2022.5.8~5.13	青霉素+头孢噻肟	吸氧	治愈	1
47床	38+5	3.55	CT双下肺支气管肺炎	无	无	126	2.9	9.1	367	29	0.2	无	5.94	<0.07	0.32	2022.4.26	5.13~5.20	头塞	无	治愈	0
59床	38+6	3.3	肺炎	无	无	170	5.2	15.9	440	37.3	0.3	无	7.37	<0.07	0.19	2022.4.29	5.9~5.15	头塞	无	治愈	0
48床	37+5	3.35	肺炎	无	无	131	5	9.1	357	38.7	0.4	无	5.58	<0.07	0.25	2022.4.16	5.3~5.9	头塞	无	治愈	0
42床	39+5	3	左下肺支气管肺炎	无	无	133	2.8	7.1	234	54.3	1.4	无	7.07	0.1	0.21	2022.4.24	5.21~5.27	头+青	无	治愈	0
39床	37+6	2.5	支气管肺炎	金葡菌/大肠埃希菌	无	127	3.9	20.5	545	38.7	<0.5	无	8.93	0.18	1.78	2022.4.24	5.23~6.2	头塞	无	好转	0
40床	41	3.5	肺纹理增多	金葡菌/耐甲葡萄球菌	无	137	5.9	16.8	347	6.8	1	无	6.66	<0.07	0.42	2022.4.29	5.23~5.28	头塞	无	治愈	0
34床	37+2	2.5	肺炎	无	无	169	4.7	18.8	319	64.4	<0.2	无	7.18	<0.07	0.08	2022.6.8	6.8~6.20	头塞+青9天	吸氧11天	好转	1
42床	39+6	2.8	双肺纹理增多	无	无	157	4.1	28.1	635	57.6	<0.5	无	7.17	<0.07	0.18	2022.5.29	6.7~6.24	头塞	无	好转	0
9床	39	2.95	右肺肺炎	无	无	212	2.8	23.5	245	68.7	<0.5	无	8.71	<0.07	0.23	2022.6.3	6.3~6.10	头孢呋辛	无	治愈	0
59床	39	3.85	右肺肺炎	痰病原:鲍曼不动杆菌	无	174	4	13.4	493	20	<0.5	无	7.44	0.16	0.78	2022.5.30	6.8~6.14	头塞	无	治愈	0
53床	39+4	3.25	阴性	痰培养:溶血葡萄球菌	青霉素等耐药	169	3.1	12.7	476	36.4	0.3	无	9.69	<0.07	0.3	2022.5.31	6.12~6.17	头+青	无	治愈	0
34	37+2	2.5	肺炎	无	无	169	4.7	18.8	319	64.4	<0.2	无	7.18	<0.07	0.08	2022.6.8	6.8~6.20	头+青	无创呼吸机	好转	1
44	40	3.7	右下肺浸润	肠道病毒咽拭子	无	158	3.1	11.4	328	43.9	0.7	无	8.59	<0.07	0.19	2022.6.11	6.17~6.24	头+青	无	治愈	0
9	38+4	3.2	肺炎	无	无	167	6.7	23.9	171	60.9	0.4	无	6.23	<0.07	0.1	2022.6.17	6.17~6.26	头+青	吸氧	好转	1
45	40+6	3.4	阴性	无	无	178	2.4	16.5	286	70.9	5.1	无	8.89	<0.07	0.13	2022.6.19	6.20~6.25	头+青	无	治愈	0
10	38+2	3.15	肺炎	无	无	174	2.2	9.2	225	58	<0.2	无	7.54	<0.07	0.09	2022.6.17	6.17~6.27	头+青	无创	好转	1
44	38	3.25	肺炎	无/水痘	无	154	3.3	8.2	385	34.2	<0.5	无	4.67	<0.07	0.45	2022.6.19	7.5~7.13	头塞5天，阿昔洛韦10天	否	好转	0
23	37+4	3.3	败血症，肺炎	产单核细胞李斯特菌	无	168	1.2	6.3	116	92.2	178.8	1.26	5.29	<0.07	0.3	2022.6.24	6.25~7.11	头塞4天，青霉素至出院	吸氧	好转	1
38	39	3.1	肺炎	无	无	179	1.3	16.6	199	62.2	<0.2	无	10.8	<0.07	0.09	2022.7.2	7.2~7.11	头+青	无	好转	0
40	39+5	4.1	阴性	无	无	170	3.4	21.6	375	68.6	2.7	无	7.62	<0.07	0.07	2022.6.30	7.1~7.7	头+青4天	无	治愈	0
42	38+5	3.4	阴性	无	无	145	2.4	9.3	340	27.4	1.6	无	5.66	<0.07	0.2	2022.6.16	7.1~7.7	头+青	无	治愈	0
53	39+1	3.57	阴性	无	无	112	6.4	19.1	524	40.9	1.4	无	5.63	<0.07	0.36	2022.6.26	7.3~7.7	头塞	无	治愈	0
26	39+2	3.4	双肺浸润	无	无	193	11.6	20.7	265	78.9	6.1	无	7.99	<0.07	0.07	2022.6.17	6.17~6.28	头+青	呼吸机亚低温	好转	2
13	38+2	2.95	肺炎	无	无	206	1.3	11.6	219	62.5	<0.5	无	11.8	<0.07	0.08	2022.6.23	6.23~7.1	头夫	无	好转	0
29	39+6	3.5	阴性	无	无	179	2.5	17	337	71.5	<0.2	无	11.9	<0.07	0.09	2022.6.24	6.24~6.30	头+青	无	治愈	0
9	39+3	2.65	肺炎	巨细胞IgM	无	160	2.2	5.2	189	47.2	1.4	无	10.4	<0.07	0.19	2022.6.29	6.29~7.6	头+青	无	治愈	0
40	38+1	3.15	阴性	无	无	192	3.7	13.1	183	68.9	<0.2	无	8.45	<0.07	0.06	2022.6.22	6.22~6.28	头+青	无	治愈	0
23	39	3.65	阴性	无	无	167	2.4	19.8	225	75.7	13	无	8.14	<0.07	0.1	2022.6.21	6.21~6.25	头+青	无	好转	0
42	37+4	3.25	阴性	无	无	177	0.8	10.7	228	61	<0.2	无	8.78	<0.07	0.1	2022.6.24	6.24~6.29	头+青	无	治愈	0
44	39+2	3.85	阴性	金葡菌	无	155	1.2	15.5	236	80.1	29.6	无	7.18	<0.07	0.08	2022.6.27	6.28~7.4	头+青	无	治愈	0
57	40+6	3.6	肺纹理增多	无	无	146	2.8	14.6	309	63.2	91.5	无	6.93	<0.07	0.77	2022.6.17	6.27~7.5	头塞	无	治愈	0
31	40+4	3	双肺肺炎	无	无	200	3.7	20	243	79.6	0.3	无	7.66	<0.07	0.05	2022-07-16	7.16~7.23	头塞	无	治愈	0
32	38+4	3.25	肺炎	痰DNA大肠埃希菌	无	184	1.3	19.3	264	76.3	3	无	5.96	<0.07	0.05	2022.7.18	7.18~7.28	头塞7天青霉素7天	无	好转	0
44	39+1	3.4	阴性	无	无	178	2.1	23.3	214	73.4	0.5	无	11.2	<0.07	0.14	2022.7.26	7.27~7.29	头+青	无	好转	0
40	38+1	2.9	阴性	无	无	170	2.6	16.6	294	77.9	<0.2	无	9.46	<0.07	0.05	2022.7.10	7.10~7.16	头+青	无	治愈	0
40	38+6	4	阴性	无	无	176	2.4	11.9	178	64.7	<0.2	无	11.3	<0.07	0.08	2022.7.17	7.17~7.22	头塞	无	治愈	0
40	39+5	4.1	阴性	无	无	170	3.4	21.6	375	68.6	2.7	无	7.62	<0.07	0.07	2022.6.30	7.1~7.7	头+青5天	无	治愈	0
42	39+4	2.65	阴性	无	无	150	6.3	9.9	479	29	0.7	无	7.43	<0.07	0.33	2022.6.26	7.8~7.16	头+青	无	好转	0
4	40	3	肺炎	无	无	172	3	15.2	355	76.2	<0.5	无	10.3	<0.07	0.11	2022.8.5	8.5~8.12	头+青	无	治愈	0
42	40+2	3.45	肺炎	大肠杆菌！	无	170	2.9	12.4	215	57.5	<0.5	无	7.55	<0.07	0.17	2022.8.12	8.12~8.20	头+青5天	吸氧	治愈	1
28	40+2	3.45	肺炎	无	无	181	3.2	7.7	203	64.1	27.5	无	7.89	<0.07	0.07	2022.8.12	8.12~8.23	头+青	无创	好转	1
51	37	3.1	阴性	无	无	96	3.7	13.7	512	36.4	0.2	无	6.54	0.11	0.63	2022.7.29	8.20~8.27	头塞	无	治愈	0
23	40+5	3.35	肺炎	无	无	184	2.5	9.3	171	6.8	<0.2	无	8.66	<0.07	0.25	2022.12.6	12.6~12.10	头塞+青	无创	治愈	1

## Sheet: 对照组
床号	孕周	体重	出生时间	入院时间	WBC	N	PLT	Hb	IgG	IgA	IgM	CRP	Lac
56床	37+6	3.2	2022.6.2	2022.6.6	5.8	35.6	178	204	9.41	<0.1	<0.1	0.4	3.4
47床	37+3	3.2	2022.6.3	2022.6.6	7.8	42.5	236	202	7.61	<0.1	<0.1	1.1	3.1
48床	37+1	2.5	2022.5.26	2022.6.6	11.2	32.5	339	176	6.69	<0.1	0.13	<0.5	5
49床	40+5	2.95	2022.6.1	2022.6.6	13	52.7	245	170	9.74	<0.1	0.35	0.5	2
52床	39+3	3.15	2022.6.5	6.9~6.13	7.9	34.1	21	161	8.23	<0.1	0.12	0.9	4.7
50床	40+1	3.25	9天	6.7~6.10	15.3	52.3	246	188	9.78	<0.1	0.38	0.8	1.5
60床	40+3	3.65	2022.6.5	6.8~6.10	18.3	70.6	206	171	7.1	<0.1	0.12	3	3.2
47床	39	3.1	2022.6.9	6.10~6.15	16.3	62.4	347	156	10.16	<0.1	<0.1	2.5	4.2
46	40+1	3.2	2022.6.9	2022.6.13	10.4	35	348	152	8.59	<0.1	<0.1	<0.5	2.1
51	37+1	2.8	2022.6.9	2022.6.14	10.4	42	342	161	7.26	<0.1	0.21	0.3	2
52	41+2	3.2	2022.6.13	2022.6.14	21.7	81.5	297	158	9.66	<0.1	0.12	6.8	2.6
54	37+4	3.2	2022.6.8	2022.6.13	7.7	31.6	328	164	8.57	<0.1	0.2	0.4	2.6
51	39+5	3.25	2022.6.10	2022.6.12	11.5	64.1	241	174	7.88	<0.1	<0.1	0.3	5.8
48	38+6	3.4	2022.6.13	2022.6.17	8.6	30.8	341	167	6.76	<0.1	0.14	2.6	3.3
47	37+4	2.95	2022.6.13	2022.6.17	17.5	73.1	435	134	9.14	<0.1	<0.1	0.6	4.8
51	38	3.35	2022.6.14	2022.6.18	9.4	44.1	312	161	6.89	<0.1	<0.1	0.6	3.6
56	39+2	3.45	2022.6.14	2022.6.18	7.8	47.2	213	159	8.05	<0.1	<0.1	11.2	4.1
50	39+3	3.65	2022.6.16	2022.6.18	16	70.6	267	172	8.79	<0.1	0.16	8.6	3.8
46	39	3.65	2022.6.17	2022.6.18	23.3	67.4	311	177	9.57	<0.1	0.11	1.3	4.9
53	40	3.25	2022.6.15	2022.6.18	12.3	48.3	283	184	9.38	<0.1	0.18	4.1	4.4
54	39+4	2.75	2022.6.13	2022.6.18	8.2	33.4	254	166	8.5	<0.1	0.16	0.7	2.7
55	37	2.5	2022.6.15	2022.6.19	9.8	46.5	344	139	9.76	<0.1	0.11	<0.5	1.5
58	38	3.05	2022.6.18	2022.6.19	16.4	72.6	250	194	9.27	<0.1	<0.1	5.39	1.9
63	40+1	3.25	2022.5.29	2022.6.20	10.3	16.5	438	150	7.42	<0.1	0.28	<0.2	3.1
62	38+4	3.15	2022.6.14	2022.6.20	9.8	51.4	307	151	7.9	<0.1	0.14	0.5	2.4
60	38	3.5	2022.6.16	2022.6.19	13.6	53.3	232	187	7.85	<0.1	<0.1	4.7	1.8
61	38	3.45	2022.6.17	2022.6.20	10.9	64.7	307	150	8.1	<0.1	0.11	6.9	1.6
65	41+1	3.25	2022.6.15	2022.6.20	13.8	41.5	260	167	10.8	<0.1	0.42	0.6	5.2
59	40+4	3.4	2022.6.17	2022.6.19	12.3	59	304	194	9.47	<0.1	0.15	5.56	3.9
54	38+2	3.4	2022.6.15	2022.6.19	9.2	32.8	351	157	7.49	<0.1	0.1	<0.5	1.2
47	39	3.45	2022.6.17	2022.6.21	9.7	37.7	310	171	7.07	<0.1	0.2	1.1	1.9
44	37+3	2.8	2022.6.19	6.22~6.28	8.8	49.3	332	163	9.83	<0.1	0.13	2.8	1.9
52	39+6	3.1	2022.6.22	6.24~6.29	13.2	62.3	374	178	10.2	<0.1	<0.1	1.9	1.8
58	40+2	2.6	2022.6.23	6.25~6.28	8.6	66.3	311	159	9.8	<0.1	0.25	1	7.9
51	38+4	2.95	2022.6.24	6.25~7.1	10	67.9	159	195	7.42	<0.1	<0.1	42	3.5
59	39+1	3.5	2022.6.23	6.25~6.27	9.7	56.7	361	138	9.32	<0.1	<0.1	无	1.6
56	39+2	3	2022.6.24	6.25~6.27	22.7	70	251	159	7.77	<0.1	0.18	1.6	4.9
55	39+2	2.85	2022.6.23	6.25~6.29	15.5	73.6	216	144	10.3	<0.1	0.15	1	2.2
49	38+4	3.4	2022.6.22	6.25~6.28	10.3	51.5	197	179	9.42	<0.1	<0.1	7.4	4.5
46	40+3	3.3	2022.6.24	6.25~6.27	8.4	63.7	171	157	6.01	<0.1	0.13	9.7	2.1
